# Supplementary material for: An efficient synthesis of chloro-aminocyclooctanediol and aminocyclooctanetriol: an unexpected acetolysis product
Source: Royal Society of Chemistry journal article supplement (doi:10.1039/d0nj02697b), 2020-01-01
Supplement: d0nj02697b1.pdf [file d0nj02697b1.pdf]

## Supplementary Information

### Efficient Synthesis of Chloro-aminocyclooctanediol and Aminocyclooctanetriol: Unexpected Acetolysis Product

Ufuk Nusret Karavaizoglu and Emine Salamci\*

Department of Chemistry, Faculty of Sciences, Atatürk University, 25240

Erzurum, Turkey

E-mail: esalamci@atauni.edu.tr

#### Table of Contents

|                                                                                                                                                           |    |
|-----------------------------------------------------------------------------------------------------------------------------------------------------------|----|
| (3S(R),4S(R),Z)-3-Azido-4-(benzyloxy)cyclooct-1-ene ( <b>6</b> ): CDCl <sub>3</sub> .....                                                                 | 2  |
| (1S(R),2R(S),3S(R),8R(S))-2-Azido-3-(benzyloxy)-9-oxabicyclo[6.1.0]nonane ( <b>7</b> ): CDCl <sub>3</sub> ( <sup>1</sup> H NMR and Double Resonance)..... | 3  |
| <sup>13</sup> C NMR of compound <b>7</b> .....                                                                                                            | 4  |
| (1S(R),2R(S),3S(R),8R(S))-2-Azido-9-oxabicyclo[6.1.0]nonan-3-ol ( <b>8</b> ): CDCl <sub>3</sub> .....                                                     | 5  |
| (1S(R),2R(S),3S(R),8R(S))-2-Amino-9-oxabicyclo[6.1.0]nonan-3-ol ( <b>9</b> ): CDCl <sub>3</sub> .....                                                     | 6  |
| (1S(R),2R(S),3S(R),4S(R))-2-Azido-4-chlorocyclooctane-1,3-diol ( <b>10</b> ): acetone-d <sub>6</sub> ( <sup>1</sup> H NMR and Double Resonance).....      | 7  |
| COSY and <sup>13</sup> C NMR of compound <b>10</b> .....                                                                                                  | 8  |
| (1S(R),2R(S),3S(R),4S(R))-2-Azido-4-chlorocyclooctane-1,3-diyl diacetate ( <b>11</b> ): CDCl <sub>3</sub> .....                                           | 9  |
| (1S(R),2R(S),3S(R),4S(R))-2-Amino-4-chlorocyclooctane-1,3-diol ( <b>12</b> ): D <sub>2</sub> O.....                                                       | 10 |
| (1R(S),2R(S),3S(R),6R(S))-2-Azidocyclooctane-1,3,6-triyl triacetate ( <b>16</b> ): CDCl <sub>3</sub> ( <sup>1</sup> H NMR and Double Resonance).....      | 11 |
| (1R(S),2R(S),3S(R),6R(S))-2-Aminocyclooctane-1,3,6-triol ( <b>18</b> ): D <sub>2</sub> O.....                                                             | 12 |
| (1R(S),2S(R),3R(S),4S(R))-3-Aminocyclooctane-1,2,4-triol ( <b>17</b> ): CD <sub>3</sub> OD.....                                                           | 13 |
| (1R(S),2R(S),7S(R),8S(R))-9-Oxabicyclo[6.1.0]nonane-2,7-diol ( <b>32</b> ): CDCl <sub>3</sub> .....                                                       | 14 |
| (1R(S),2R(S),7S(R),8S(R))-9-Oxabicyclo[6.1.0]nonane-2,7-diyl diacetate ( <b>33</b> ): CDCl <sub>3</sub> .....                                             | 15 |
| X-ray Crystallographic Data.....                                                                                                                          | 16 |
| X-ray crystallographic data of compound <b>10</b> .....                                                                                                   | 16 |
| X-ray crystallographic data of compound <b>16</b> .....                                                                                                   | 17 |

# <sup>1</sup>H NMR and <sup>13</sup>C NMR Spectra

(3*S*(*R*),4*S*(*R*),*Z*)-3-Azido-4-(benzyloxy)cyclooct-1-ene (6): CDCl<sub>3</sub>

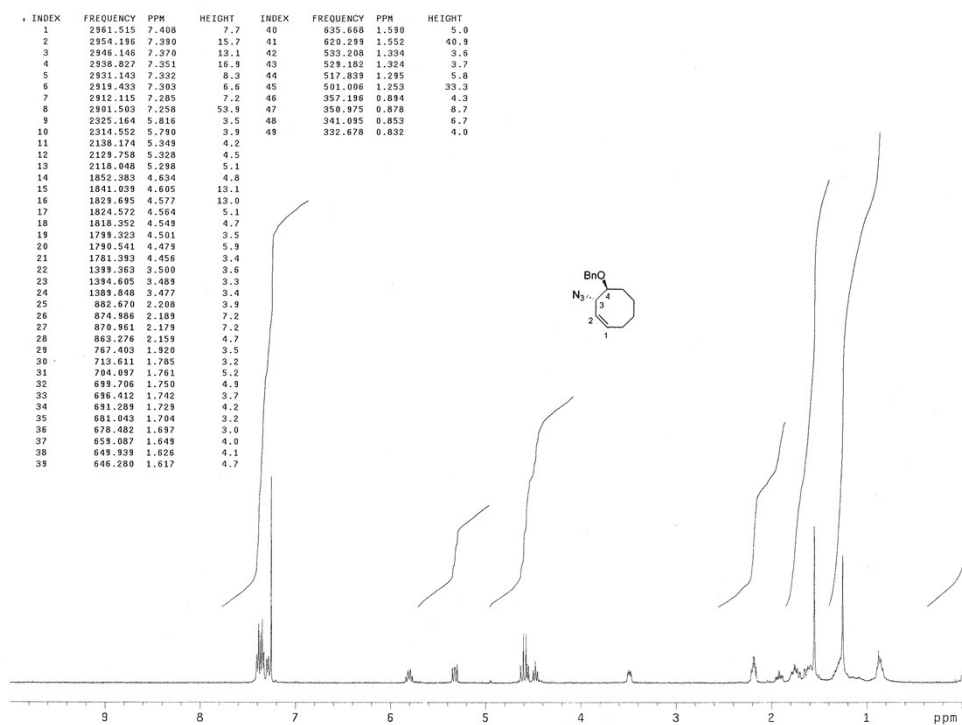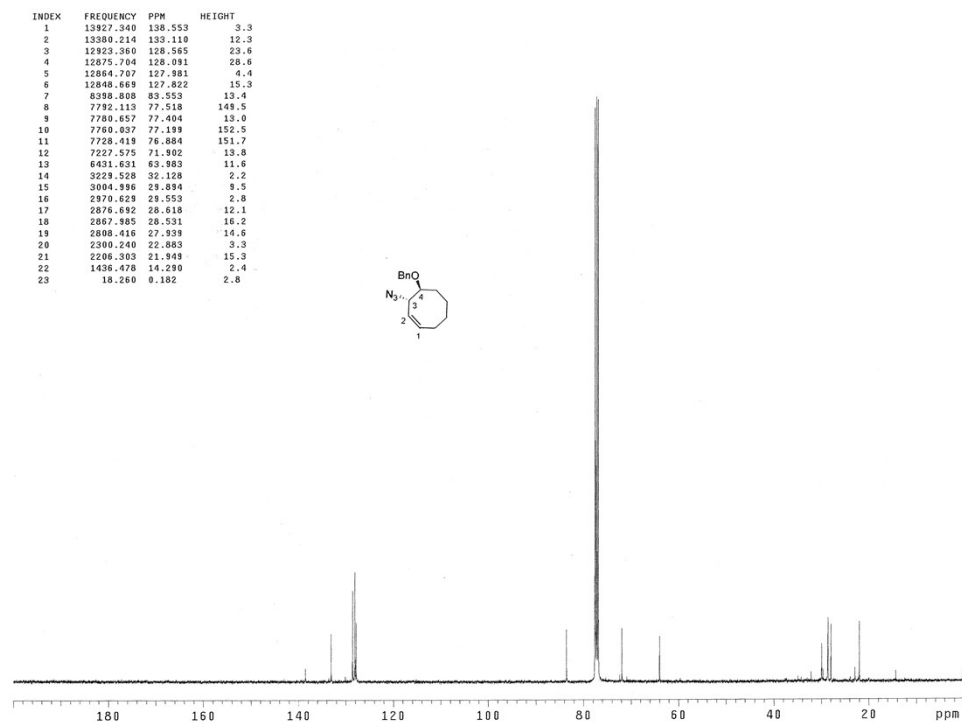

**(1*S*(*R*),2*R*(*S*),3*S*(*R*),8*R*(*S*))-2-Azido-3-(benzyloxy)-9-oxabicyclo[6.1.0]nonane (7): CDCl<sub>3</sub> (<sup>1</sup>H NMR and Double Resonance)**

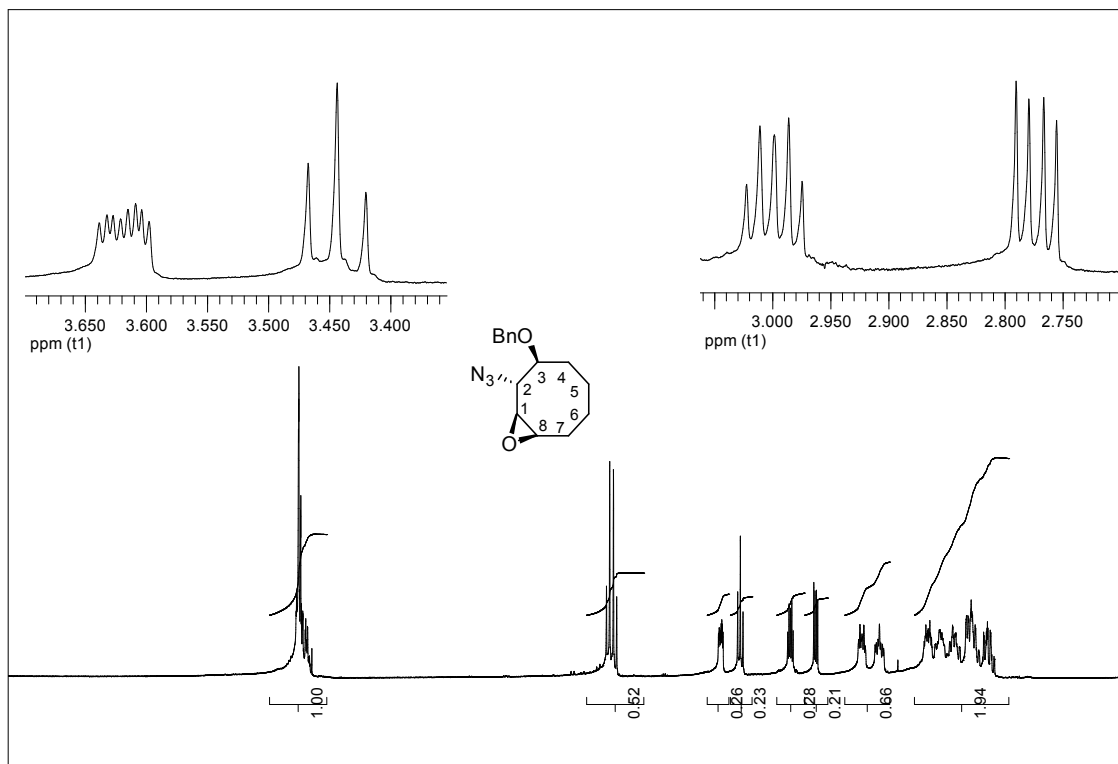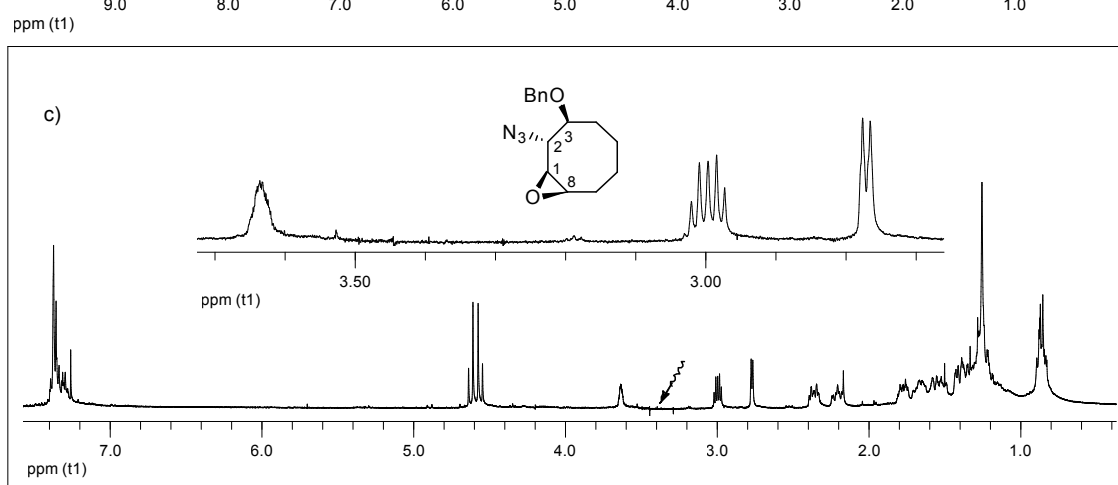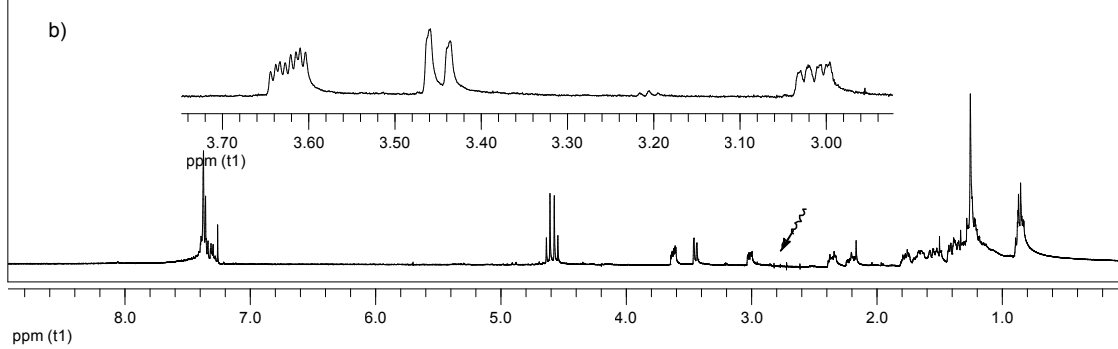

<sup>13</sup>C NMR of compound 7

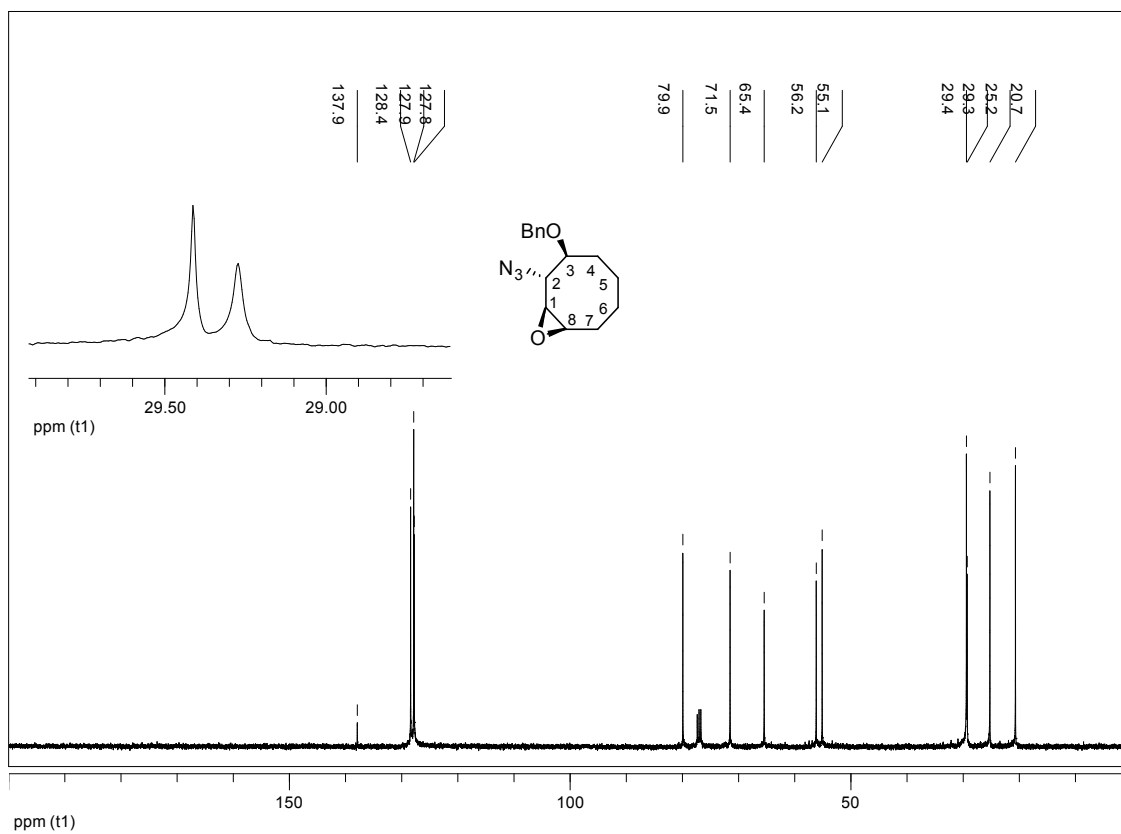

(1*S*),2*R*(*S*),3*S*(*R*),8*R*(*S*)-2-Azido-9-oxabicyclo[6.1.0]nonan-3-ol (**8**): CDCl<sub>3</sub>

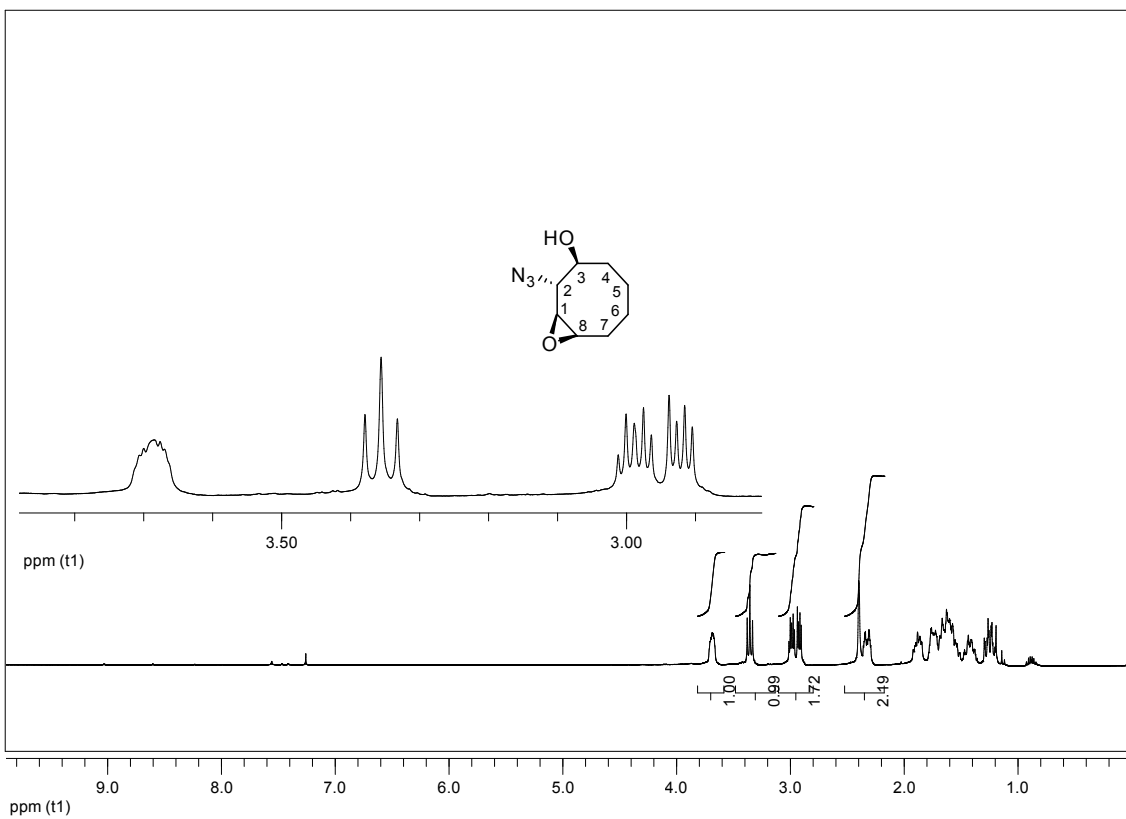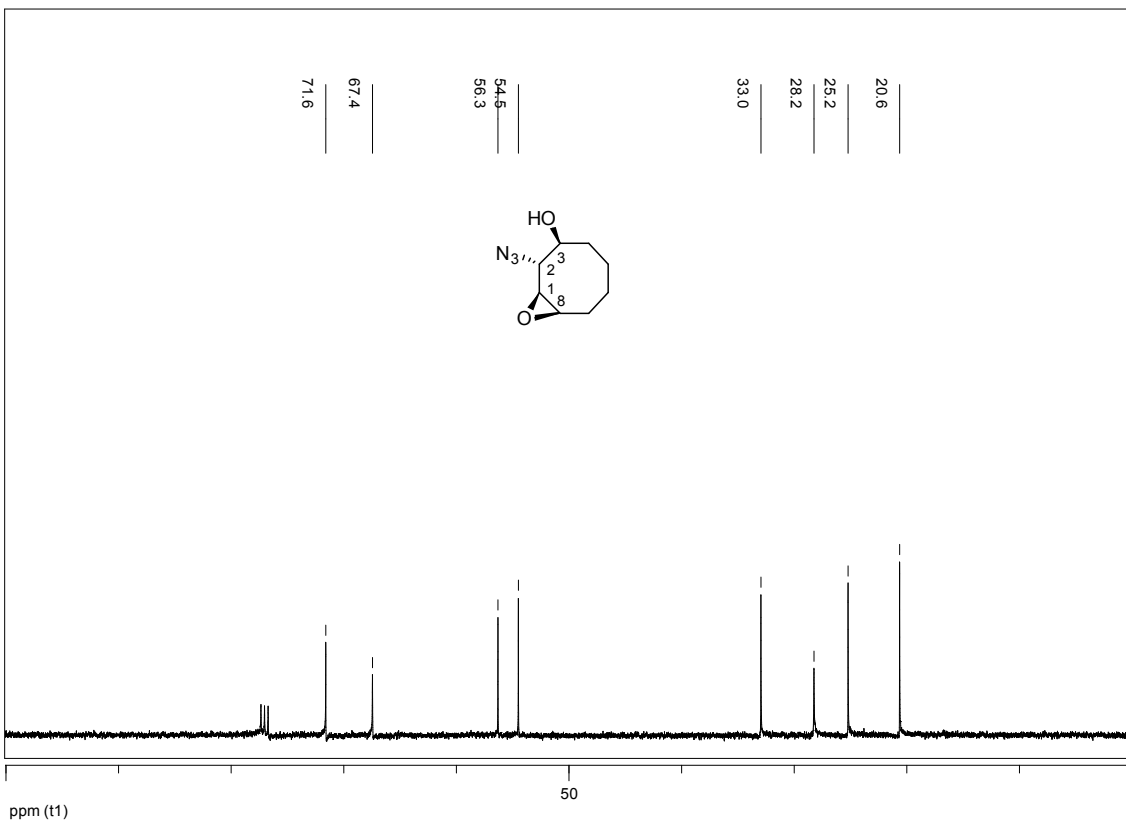

(1*S*(*R*),2*R*(*S*),3*S*(*R*),8*R*(*S*))-2-Amino-9-oxabicyclo[6.1.0]nonan-3-ol (9): CDCl<sub>3</sub>

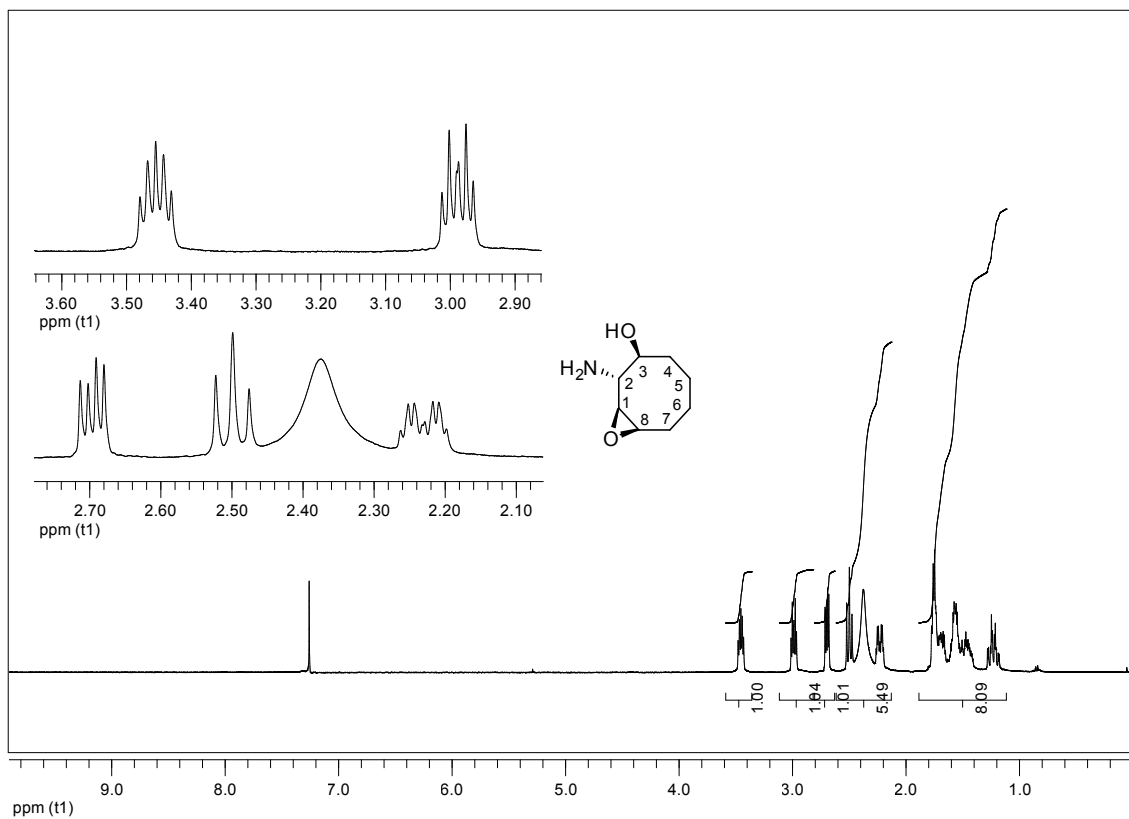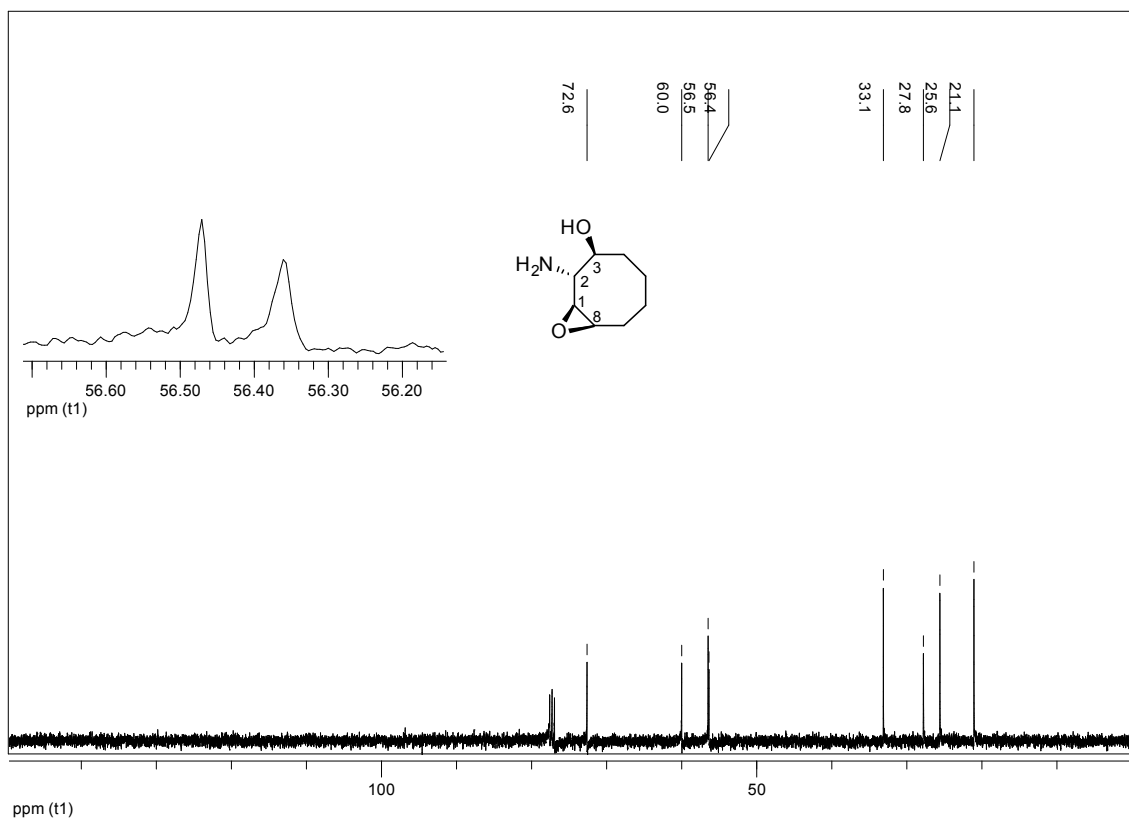

**(1*S*,2*R*(*S*),3*S*(*R*),4*S*(*R*))-2-Azido-4-chlorocyclooctane-1,3-diol (10): acetone-*d*<sub>6</sub> (<sup>1</sup>H NMR and Double Resonance)**

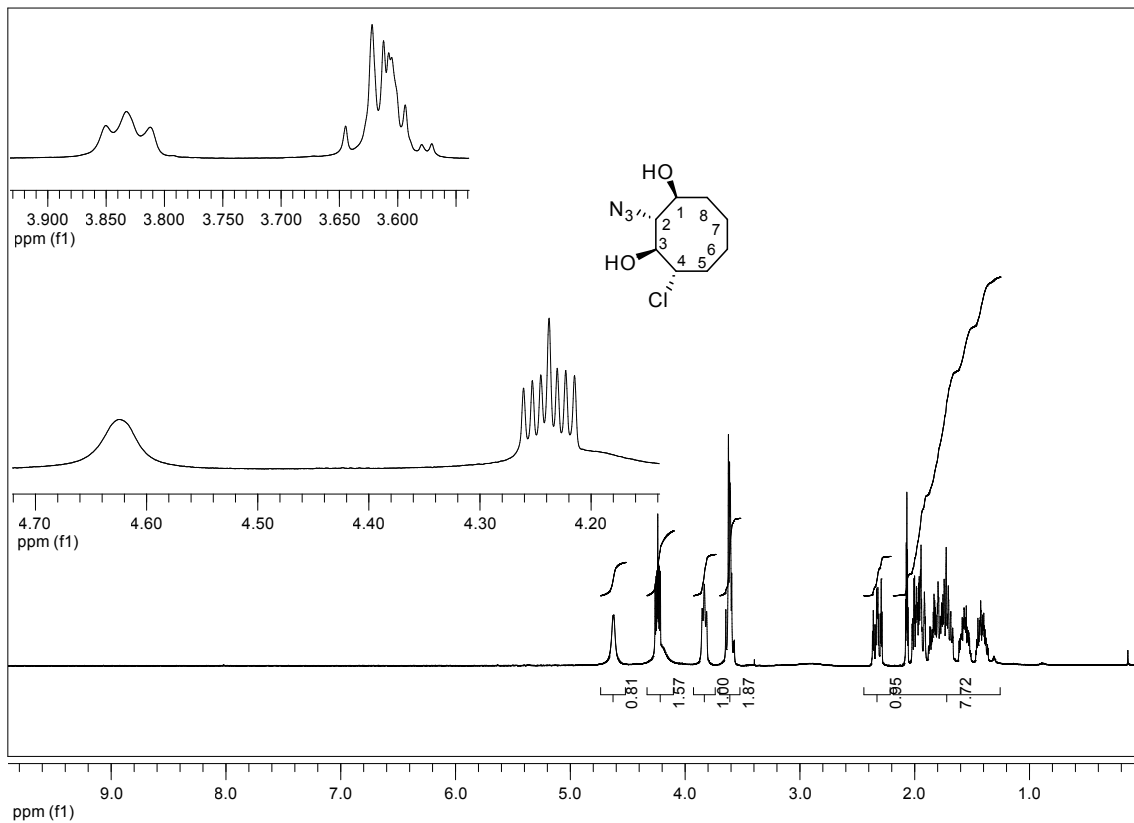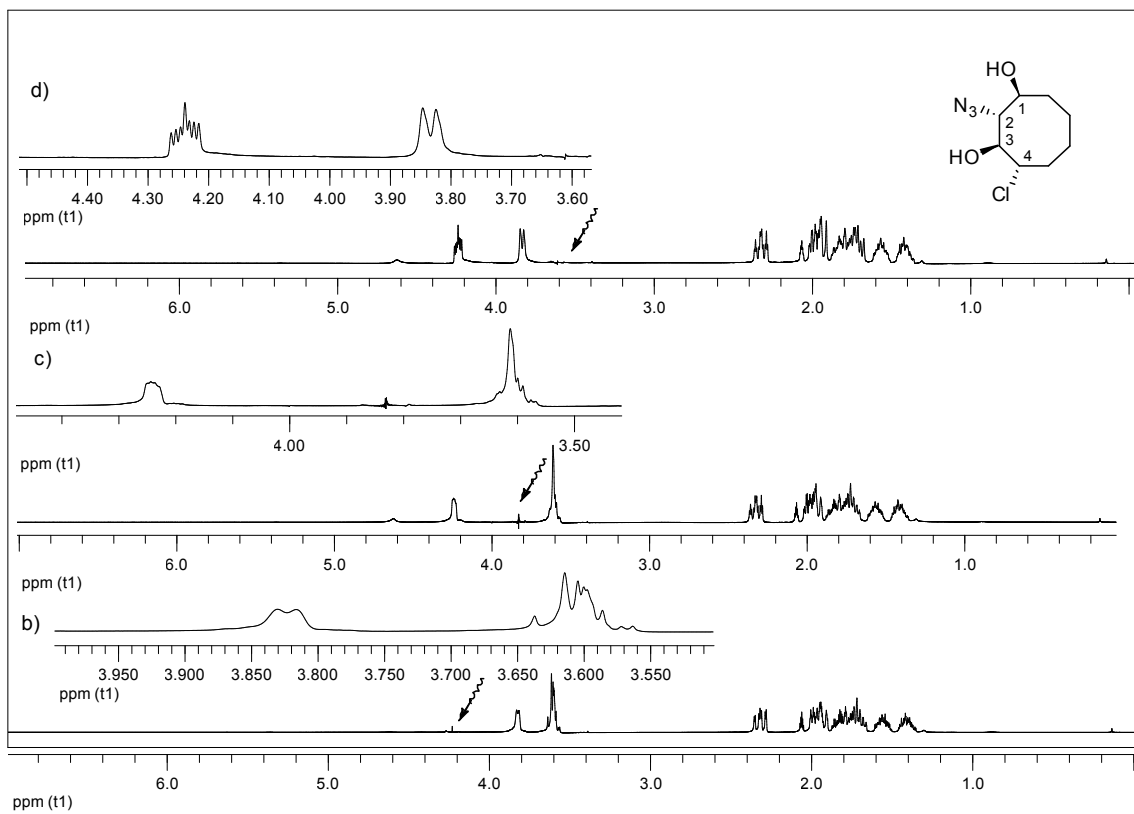

COSY and  $^{13}\text{C}$  NMR of compound 10

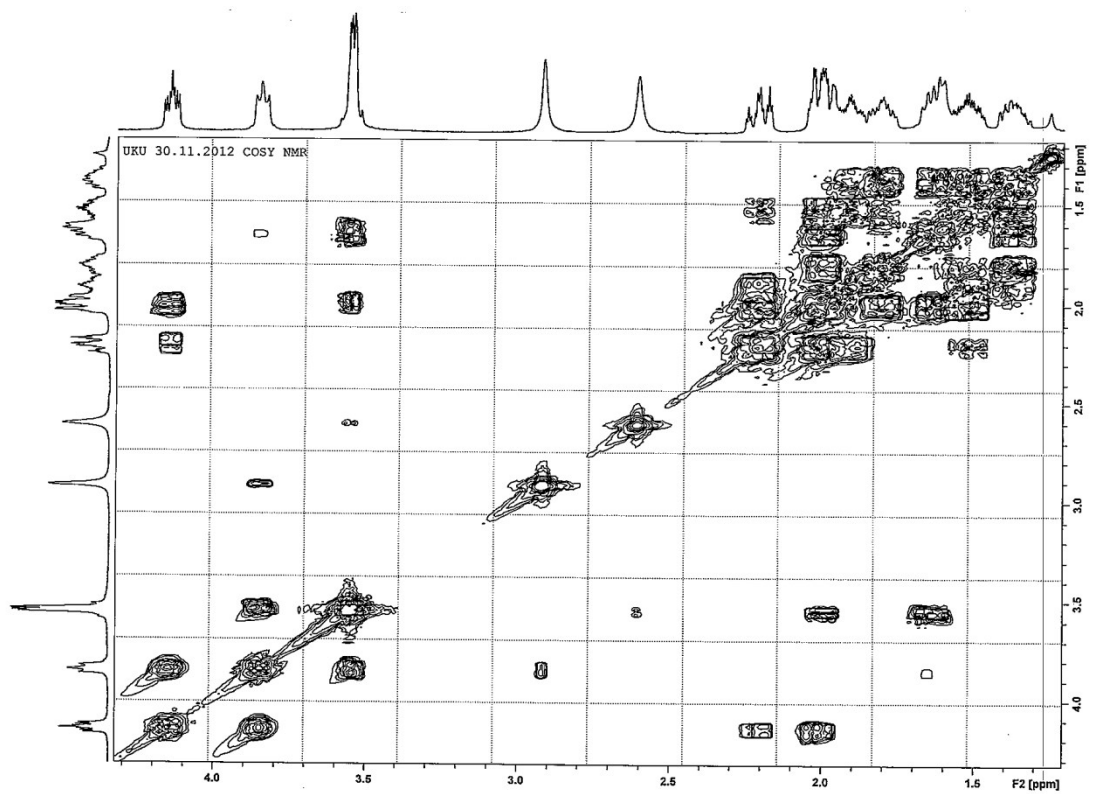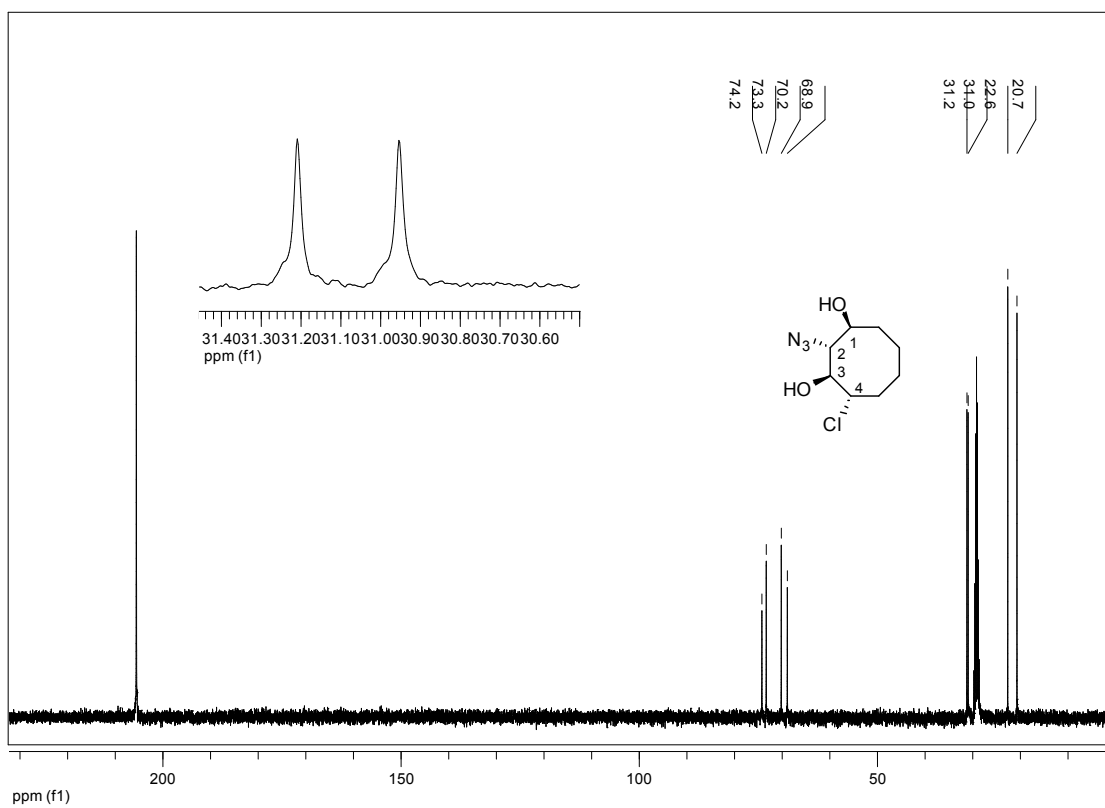



(1*S*,2*R*,3*S*,4*S*)-2-Azido-4-chlorocyclooctane-1,3-diyl diacetate (**11**): CDCl<sub>3</sub>

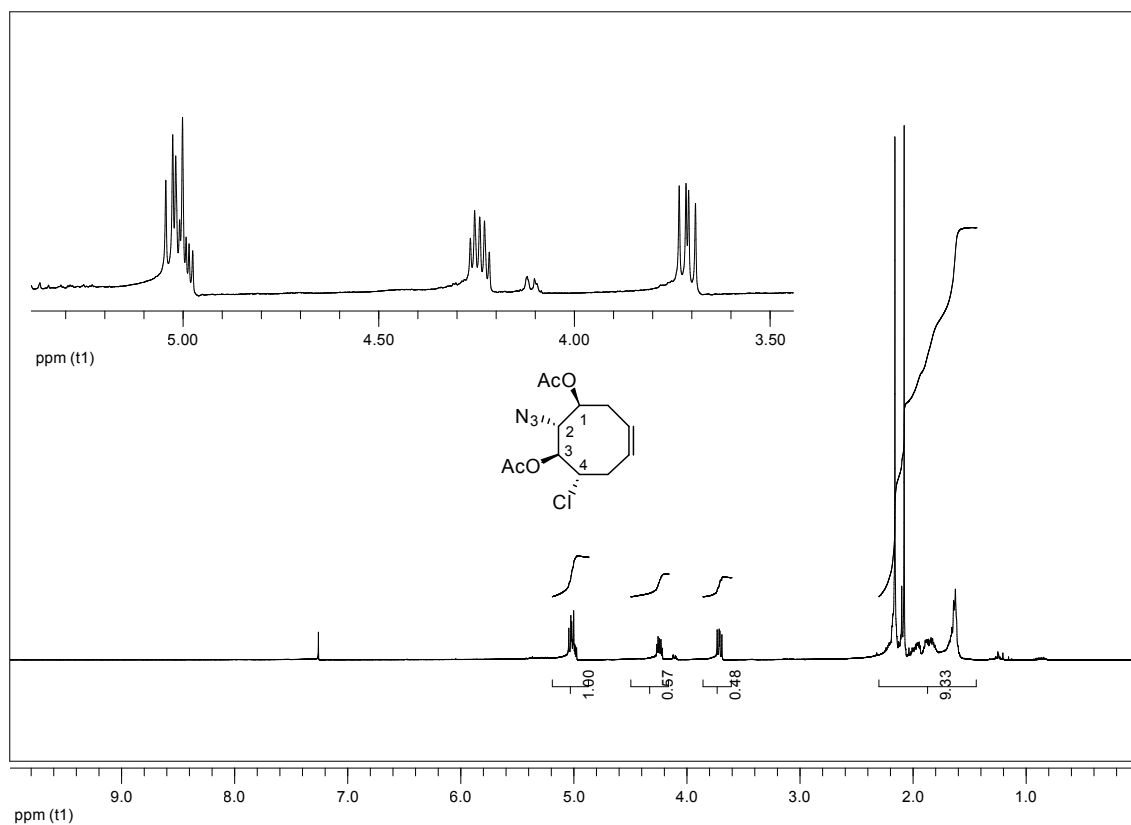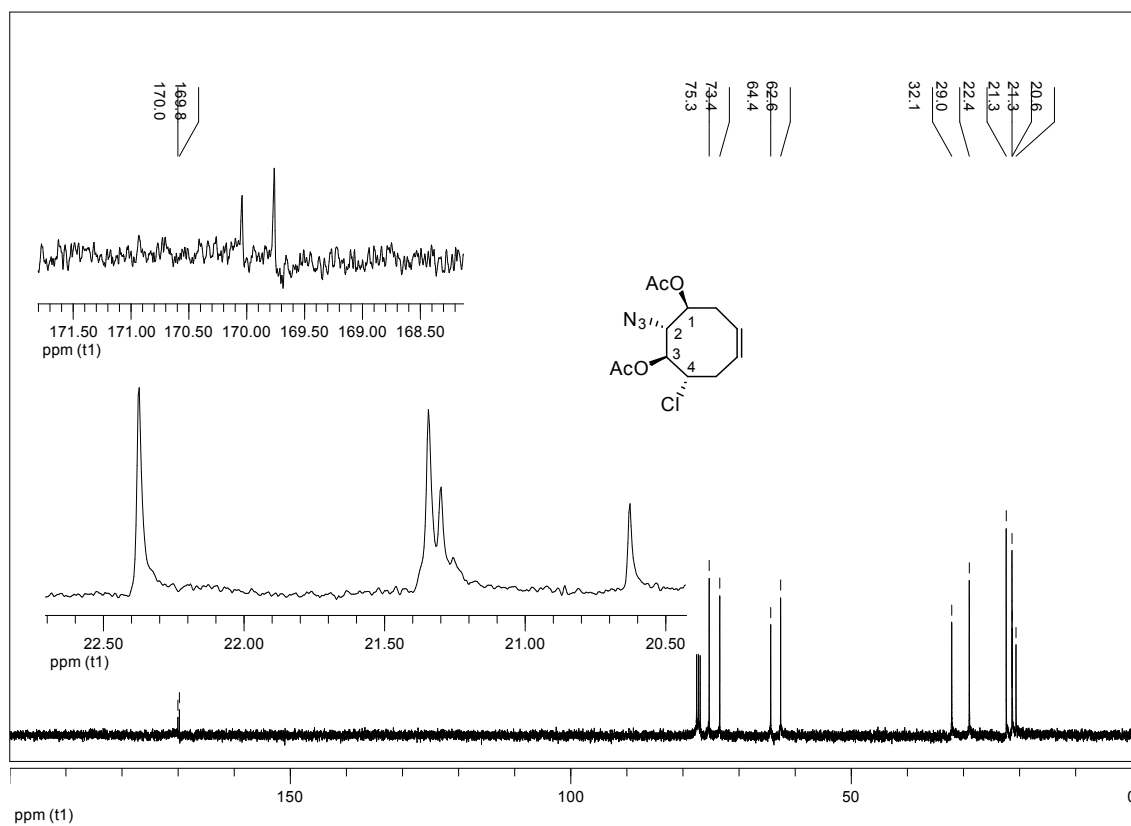

**(1*S*,2*R*,3*S*,4*R*)-2-Amino-4-chlorocyclooctane-1,3-diol (12): D<sub>2</sub>O**

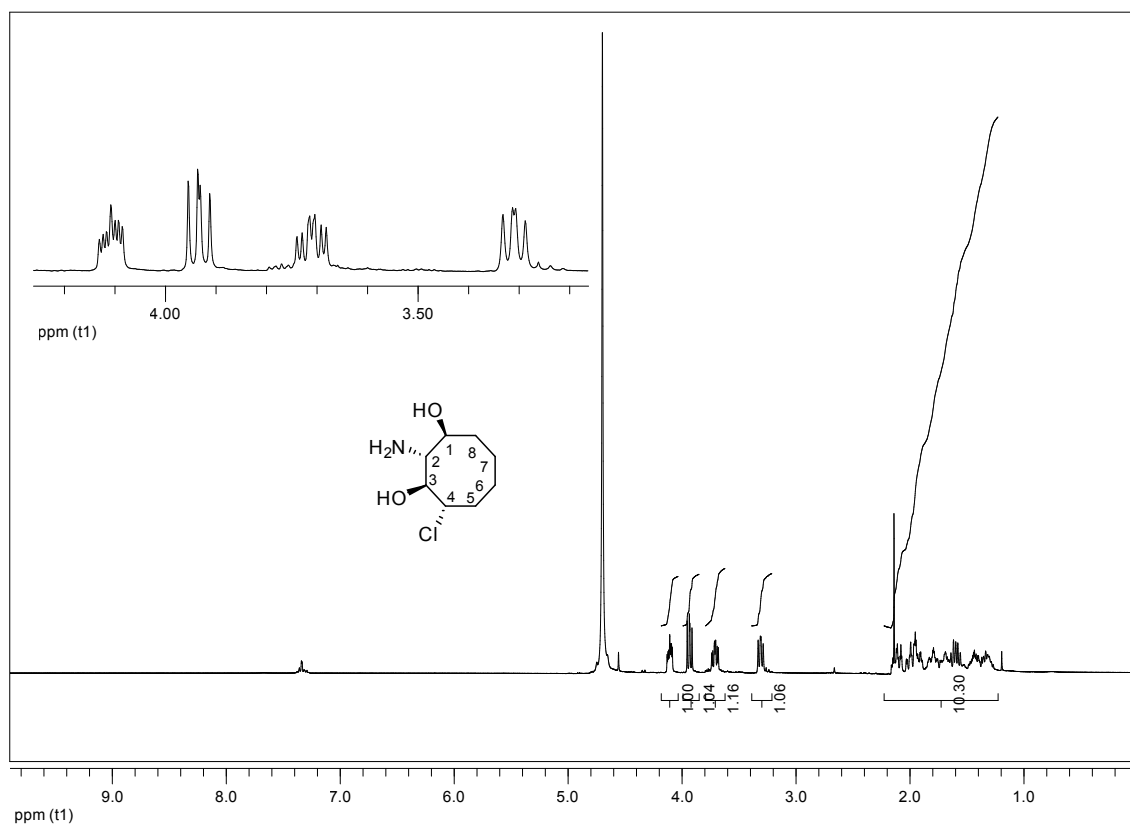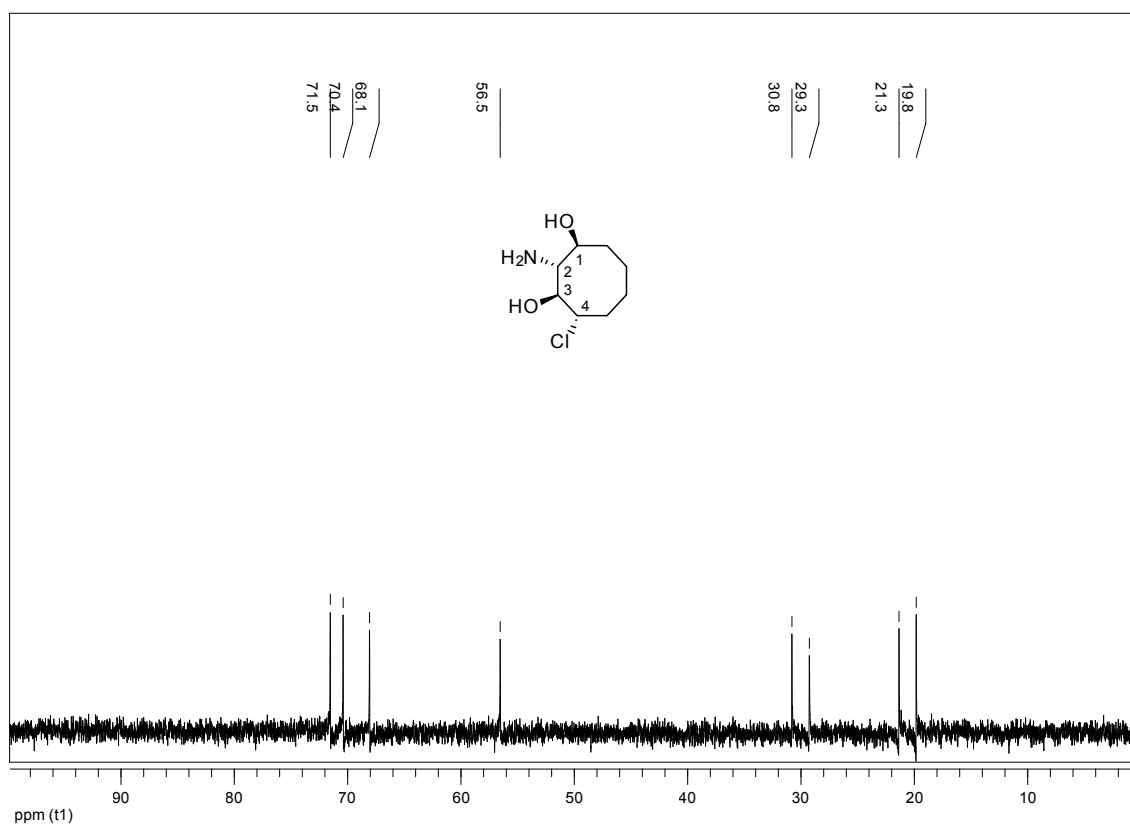



**(1*R*(*S*),2*R*(*S*),3*S*(*R*),6*R*(*S*))-2-Aminocyclooctane-1,3,6-triol (18): D<sub>2</sub>O**

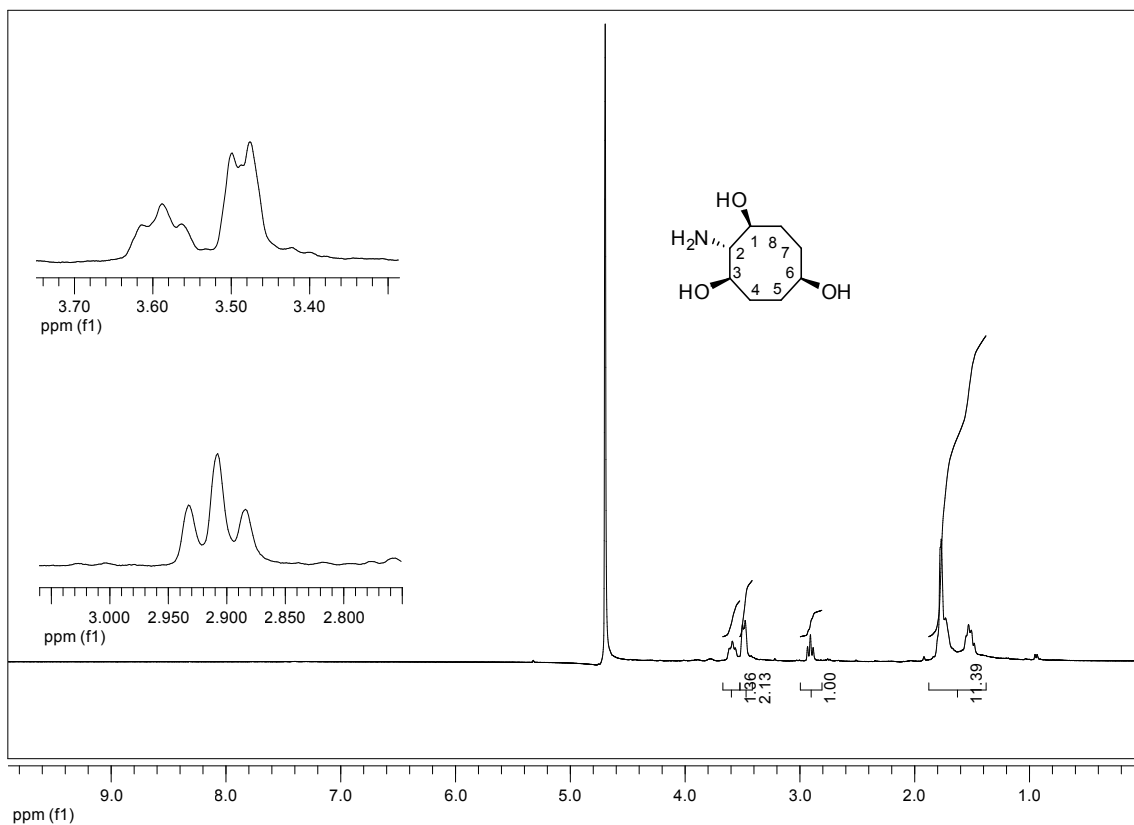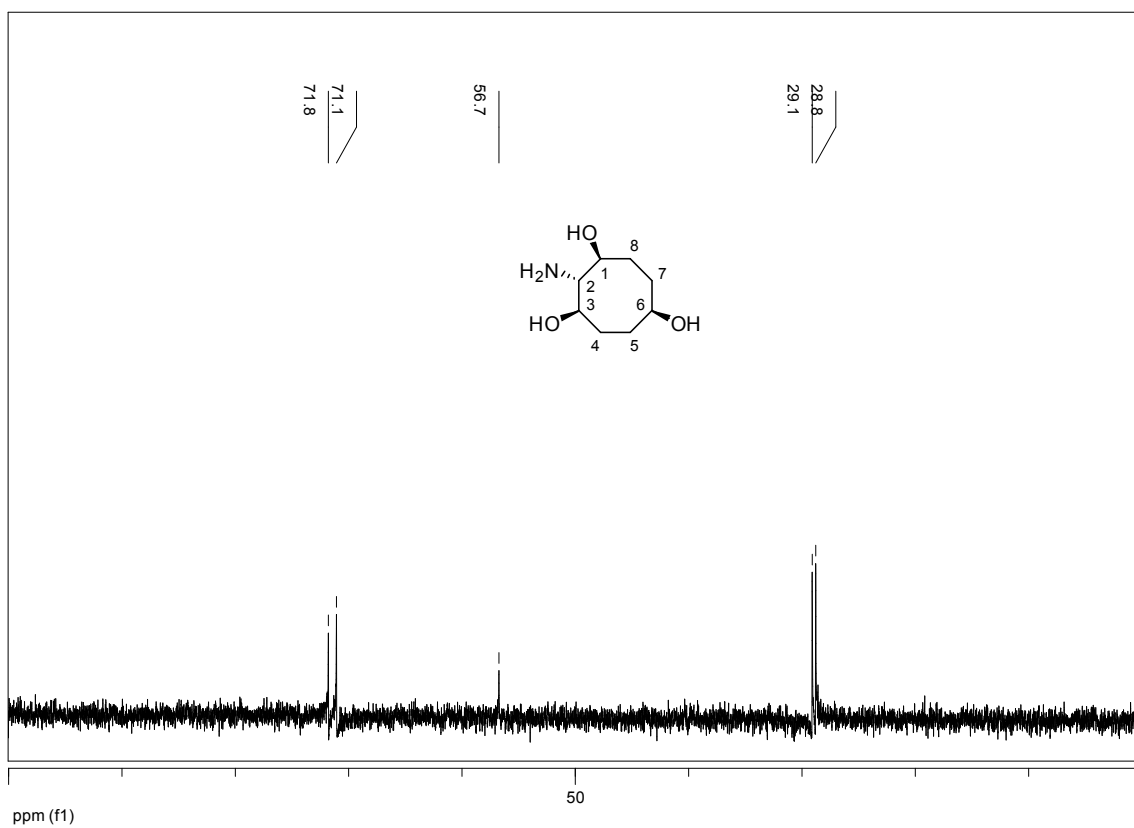

**(1*R*(*S*),2*S*(*R*),3*R*(*S*),4*S*(*R*))-3-Aminocyclooctane-1,2,4-triol (17): CD<sub>3</sub>OD**

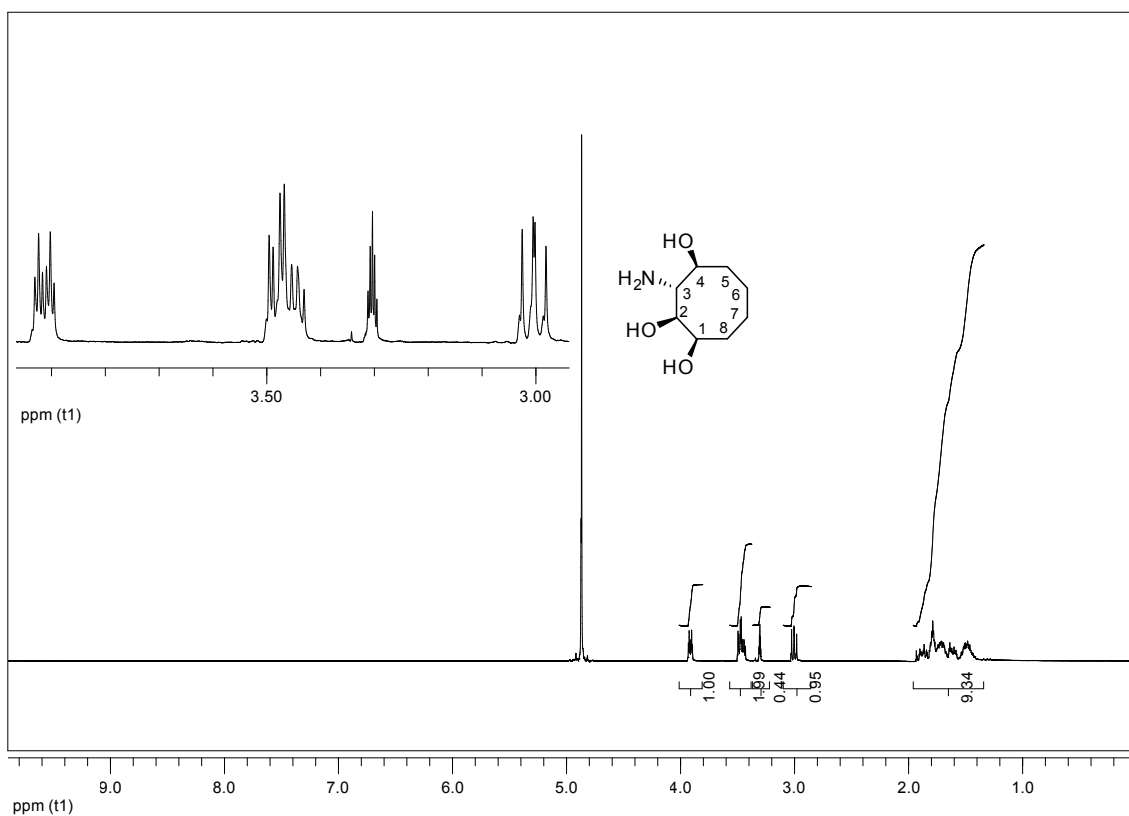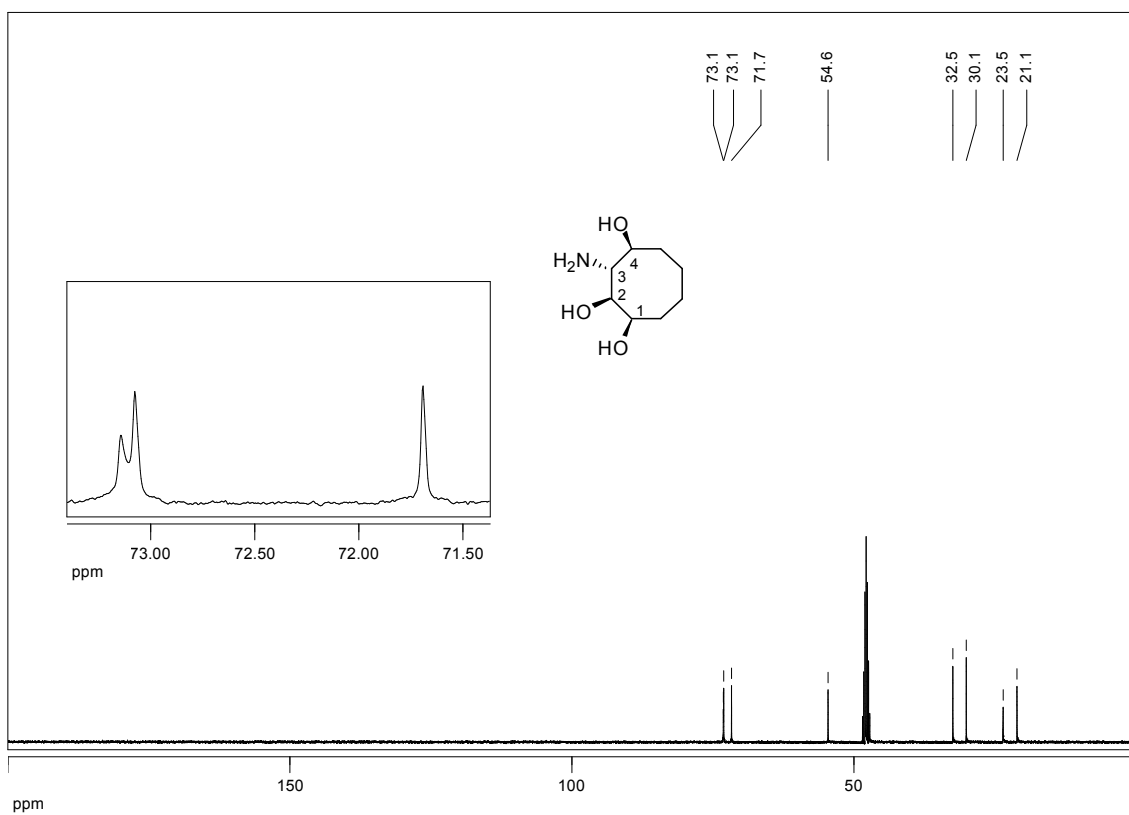

**(1*R*(*S*),2*R*(*S*),7*S*(*R*),8*S*(*R*))-9-Oxabicyclo[6.1.0]nonane-2,7-diol (32): CDCl<sub>3</sub>**

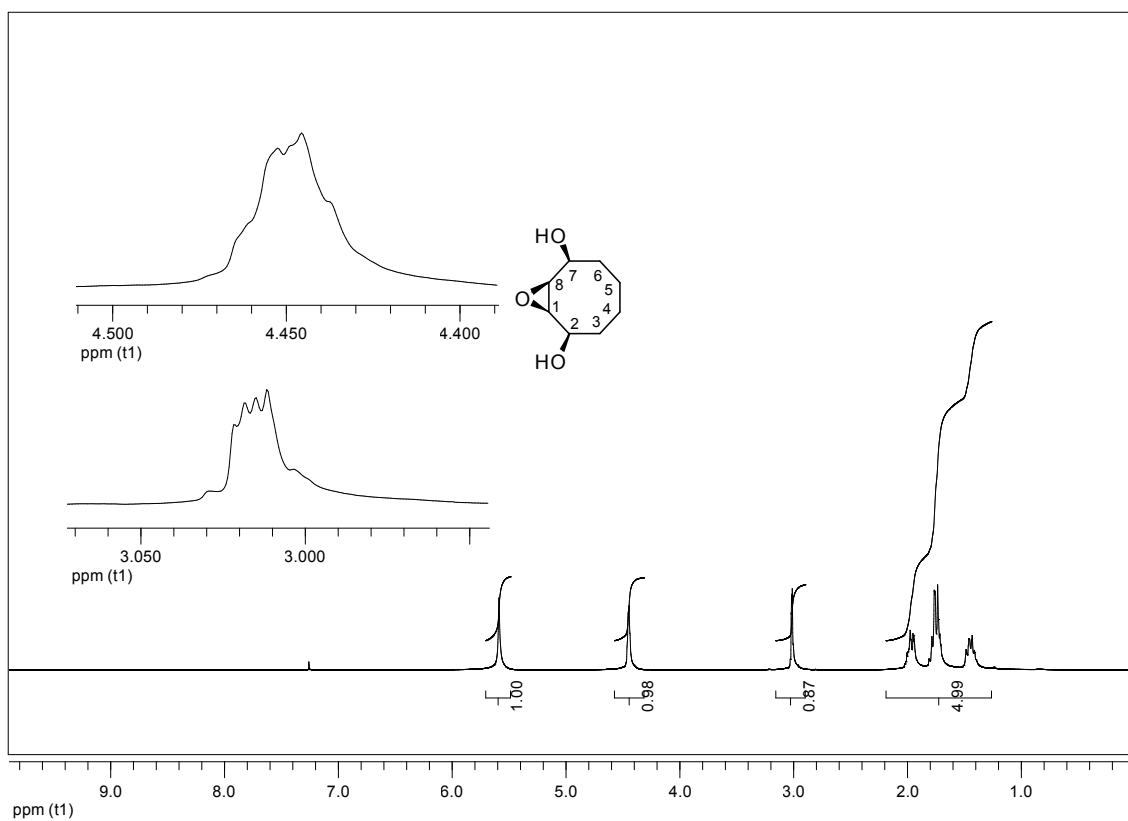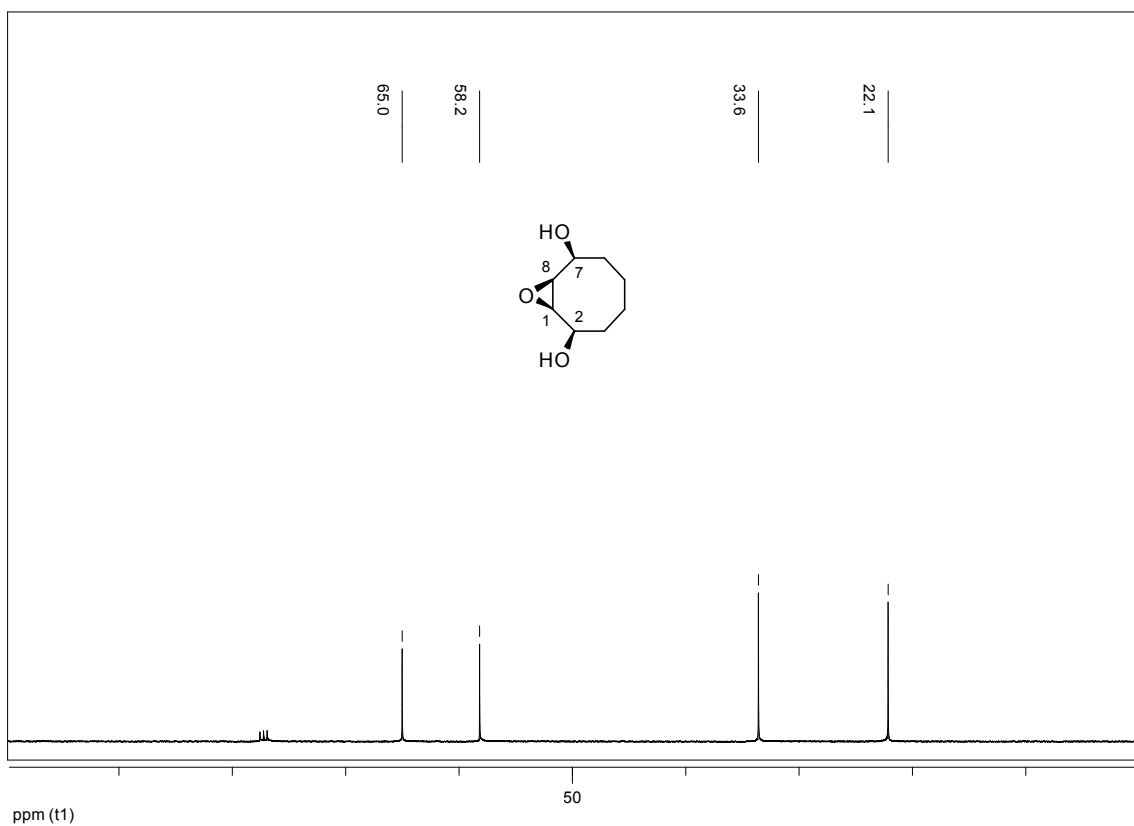

**(1*R*(*S*),2*R*(*S*),7*S*(*R*),8*S*(*R*))-9-Oxabicyclo[6.1.0]nonane-2,7-diyl diacetate (33): CDCl<sub>3</sub>**

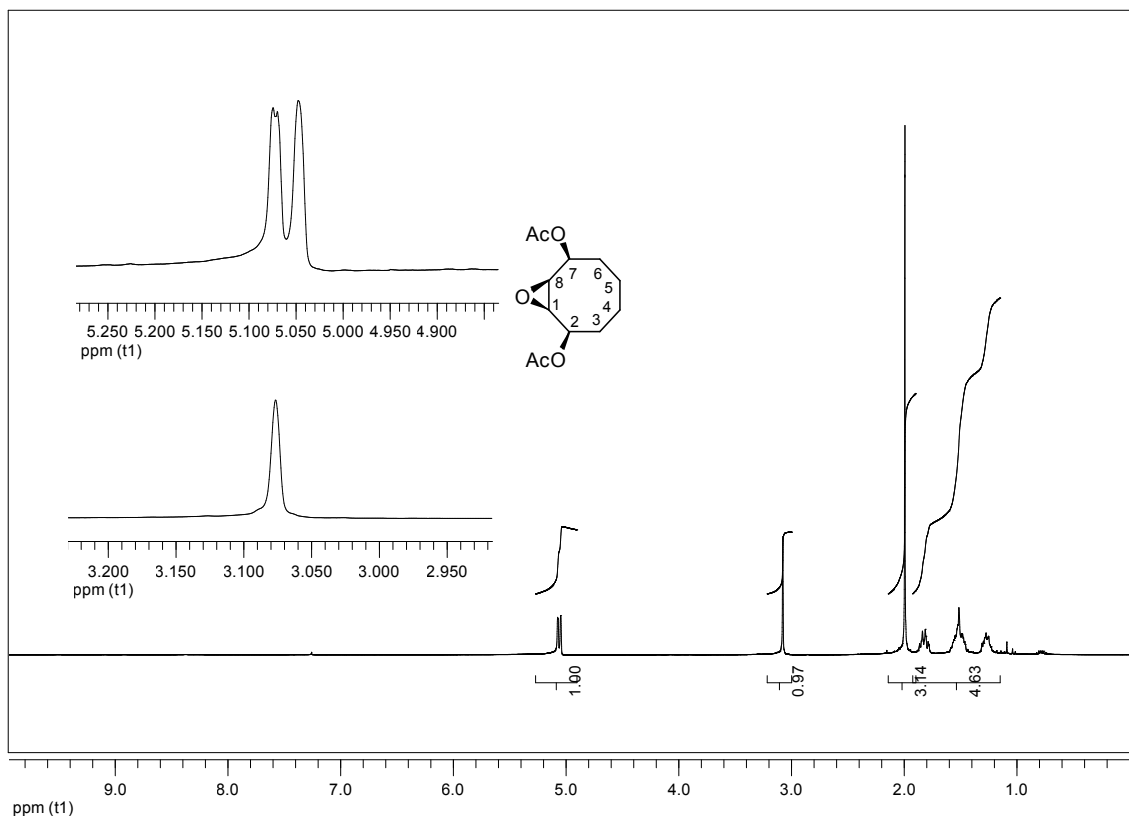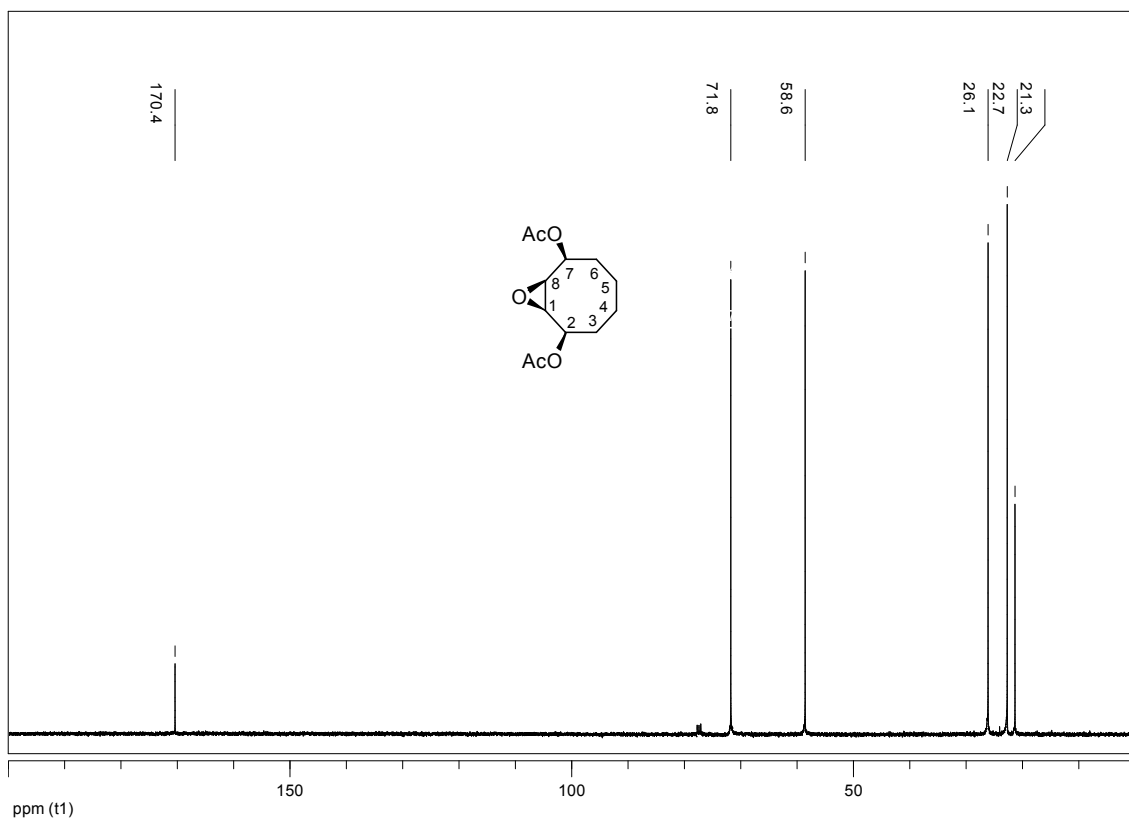

### X-ray Crystallographic Data

For the crystal structure determination, single-crystal of the compounds **10** and **16** was used for data collection on a four-circle Rigaku R-AXIS RAPID-S diffractometer (equipped with a two-dimensional area IP detector). Graphite-monochromated Mo-K $\alpha$  radiation ( $\lambda = 0.71073 \text{ \AA}$ ) and oscillation scans technique with  $\Delta\omega = 5^\circ$  for one image were used for data collection. The lattice parameters were determined by the least-squares methods based on all reflections with  $F^2 > 2\sigma(F^2)$ . Integration of the intensities, correction for Lorentz and polarization effects and cell refinement were performed using CrystalClear (Rigaku/MSC Inc., 2005) software.\* The structure was solved by direct methods using SHELXS-97<sup>2</sup> and non-hydrogen atoms were refined using anisotropic displacement parameters by full-matrix least-squares procedure using the program SHELXL-97.<sup>2</sup> Hydrogen atoms were positioned geometrically and refined using a riding model. The final difference Fourier maps showed no peaks of chemical significance. Details about the analysed crystal and data collection are presented in Tables S1 and S2, respectively.

### X-ray crystallographic data of compound **10**

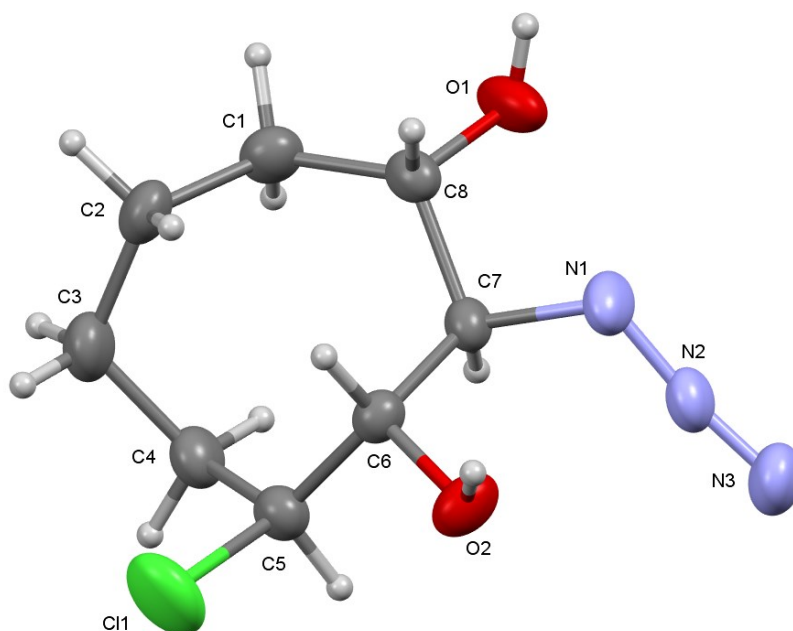

**Figure S1** X-ray crystal structure of **10**

### **Table S1** Crystal data and structure refinement for compound **10**

\* Rigaku/MSC, Inc., 9009 new Trails Drive, The Woodlands, TX 77381-5209, USA, 2005.

<sup>2</sup> G.M. Sheldrick, SHELXS-97, SHELXL-97 Program for Crystal Structure Solution and refinement, University of Gottingen, Göttingen, Germany, 1997.



|                                         |                                                                                                             |
|-----------------------------------------|-------------------------------------------------------------------------------------------------------------|
| Empirical formula                       | C <sub>8</sub> H <sub>14</sub> ClN <sub>3</sub> O <sub>2</sub>                                              |
| Formula weight                          | 219.67                                                                                                      |
| Temperature                             | 296 K                                                                                                       |
| Wavelength                              | 0.71073 Å                                                                                                   |
| Crystal system, space group             | orthorhombic, <i>Pbca</i> ; (no: 61)                                                                        |
| Unit cell dimensions                    | $a = 20.7755(3)$ , $b = 8.7032(1)$ , $c = 22.9649(4)$ Å, $\alpha = 90$ , $\beta = 90$ , $\gamma = 90^\circ$ |
| Volume                                  | 4152.36(11) Å <sup>3</sup>                                                                                  |
| Z, calculated density                   | 16, 1.406 g/cm <sup>3</sup>                                                                                 |
| absorption coefficient                  | 0.348 mm <sup>-1</sup>                                                                                      |
| $F(000)$                                | 1856                                                                                                        |
| $\theta$ -range for data collection     | 1.7-26.4°                                                                                                   |
| refinement method                       | full matrix least-square on $F^2$                                                                           |
| data/parameters                         | 3607/258                                                                                                    |
| goodness-of-fit on $F^2$                | 1.051                                                                                                       |
| final $R$ -indices [ $I > 2\sigma(I)$ ] | $R_1 = 0.043$ , $wR_2 = 0.114$                                                                              |
| largest diff. peak and hole             | 0.471 and -0.367 e Å <sup>-3</sup>                                                                          |

**X-ray crystallographic data of compound 16**

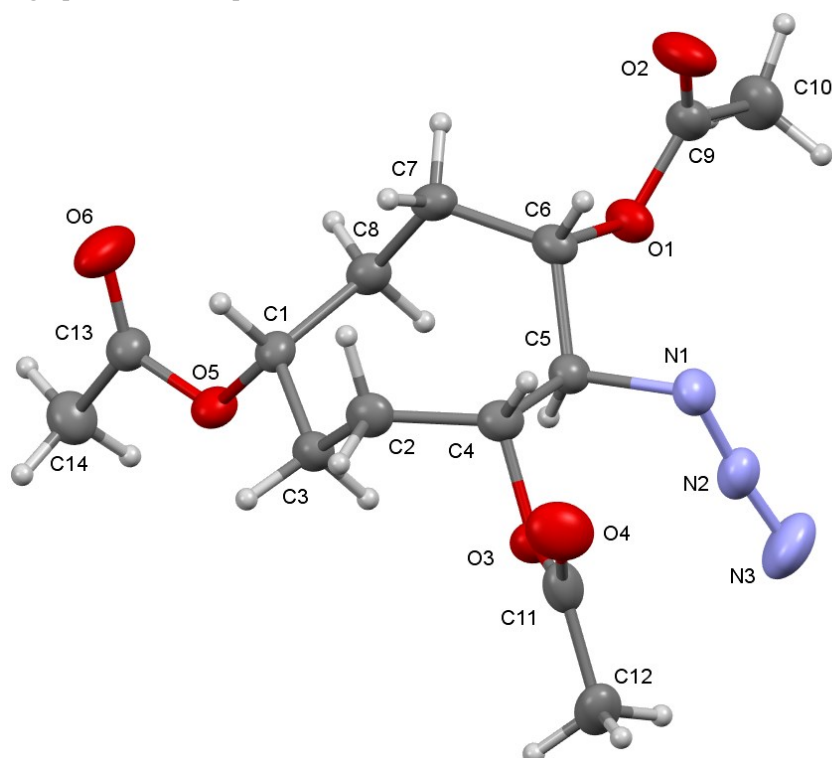

**Figure S2** X-ray crystal structure of **16**

**Table S2** Crystal data and structure refinement for compound **16**

|                                         |                                                                                                                     |
|-----------------------------------------|---------------------------------------------------------------------------------------------------------------------|
| Empirical formula                       | $C_{14}H_{21}N_3O_6$                                                                                                |
| Formula weight                          | 327.34                                                                                                              |
| Temperature                             | 296 K                                                                                                               |
| Wavelength                              | 0.71073 Å                                                                                                           |
| Crystal system, space group             | tetragonal, $P4_12_12$ ; (no: 92)                                                                                   |
| Unit cell dimensions                    | $a = 12.7747(4)$ , $b = 12.7747(4)$ , $c = 20.7228(9)$ Å, $\alpha = 90$ , $\beta = 97.176(3)$ , $\gamma = 90^\circ$ |
| Volume                                  | $3381.8(3)$ Å <sup>3</sup>                                                                                          |
| Z, calculated density                   | 8, 1.286 g/cm <sup>3</sup>                                                                                          |
| absorption coefficient                  | $0.101$ mm <sup>-1</sup>                                                                                            |
| $F(000)$                                | 1392                                                                                                                |
| $\theta$ -range for data collection     | $2.2$ - $26.4^\circ$                                                                                                |
| refinement method                       | full matrix least-square on $F^2$                                                                                   |
| data/parameters                         | 2870/212                                                                                                            |
| goodness-of-fit on $F^2$                | 1.067                                                                                                               |
| final $R$ -indices [ $I > 2\sigma(I)$ ] | $R_1 = 0.044$ , $wR_2 = 0.107$                                                                                      |
| largest diff. peak and hole             | $0.189$ and $-0.146$ e Å <sup>-3</sup>                                                                              |
